# Supplementary material
Source: ML conference proceedings conference paper supplement (https://openaccess.thecvf.com/content/CVPR2024/html/Wu_Dynamic_LiDAR_Re-simulation_CVPR_2024_paper.html)
Supplement: Supplementary file 1 [file Wu_Dynamic_LiDAR_Re-simulation_CVPR_2024_supplemental.zip]

Archive with 4 entries (4 files):
- DyNFL_supp.pdf
- __MACOSX/._DyNFL_supp.pdf
- DyNFL_video.mp4
- __MACOSX/._DyNFL_video.mp4
